# Supplementary material for: Carbon beads with a well-defined pore structure derived from ion-exchange resin beads
Source: Royal Society of Chemistry journal article supplement (doi:10.1039/c9ta04069b), 2019-01-01
Supplement: c9ta04069b1.pdf [file c9ta04069b1.pdf]

## Supporting information

### Carbon beads with well-defined pore structure derived from ion-exchange resin beads

Ping He,<sup>a</sup> Kok-Giap Haw,<sup>a</sup> Shichen Yan,<sup>a</sup> Lingxue Tang,<sup>a</sup> Qianrong Fang,<sup>a</sup> Shilun Qiu,<sup>a</sup> Valentin Valtchev<sup>a,b\*</sup>

<sup>a</sup>State Key Laboratory of Inorganic Synthesis and Preparative Chemistry, Jilin University, Changchun 130012, China.

<sup>b</sup>Normandie Univ, ENSICAEN, UNICAEN, CNRS, Laboratoire Catalyse et Spectrochimie, 6 Marechal Juin, 14050 Caen, France.

E-mail: [valentin.valtchev@ensicaen.fr](mailto:valentin.valtchev@ensicaen.fr)

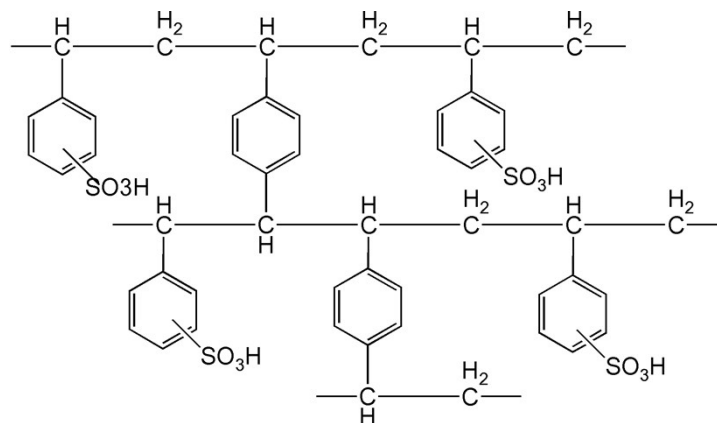

**Scheme S1.** Chemical structure (H-form) of the cation exchange resin beads.

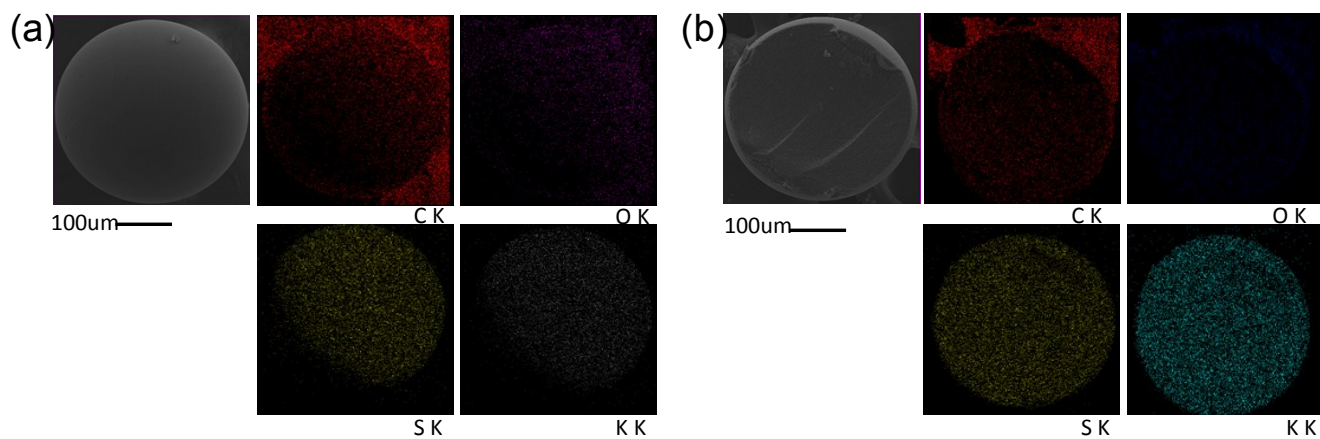

**Fig. S1.** EDS mapping of the distribution of the elements in MSC-0.3 (0.3 M KCl exchanged) resin beads: (a) general view and (b) cross-section view.

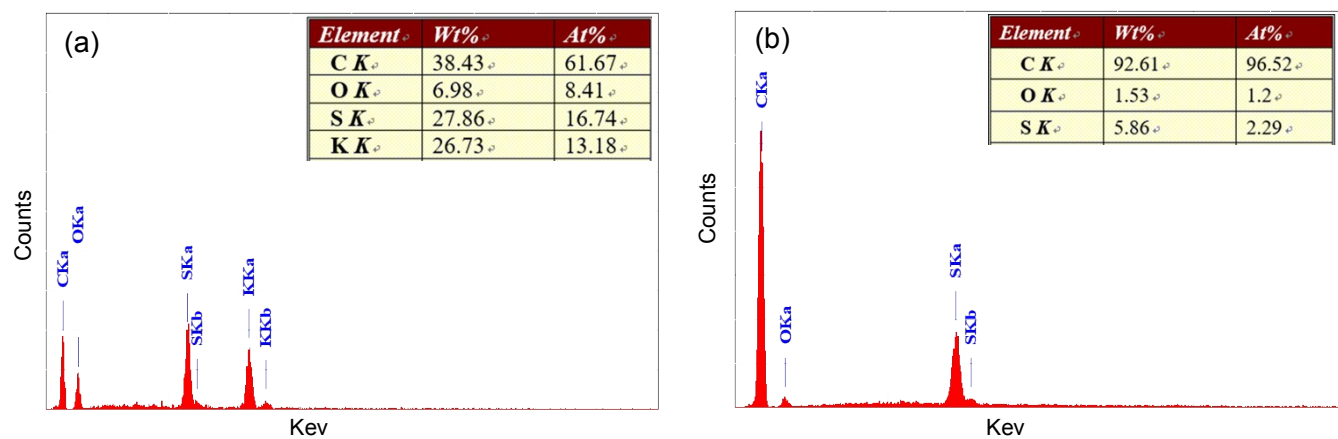

**Fig. S2.** EDS spectra of (a) K<sup>+</sup>-exchanged resin beads and (b) the corresponding MSC-0.3-900 activated carbon bead. Inset: elements content.

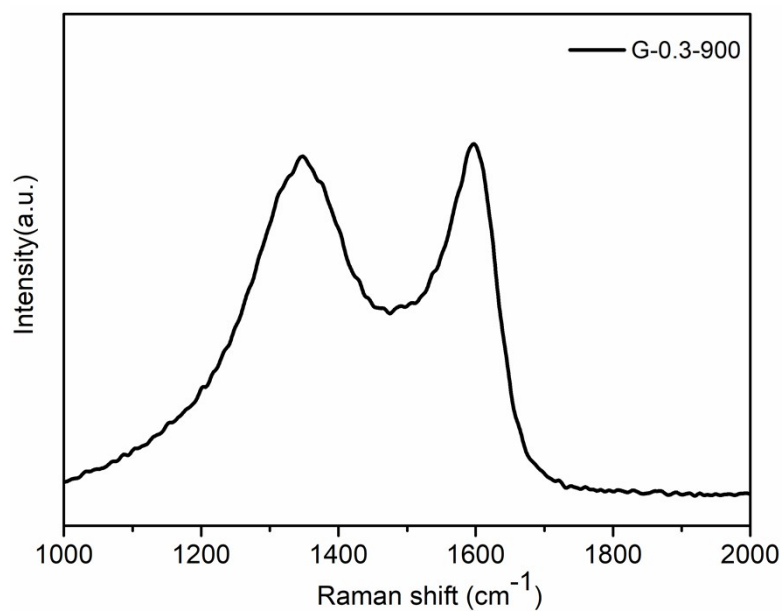

**Fig. S3.** Raman spectrum of GCB-0.3-900 activated carbon beads.

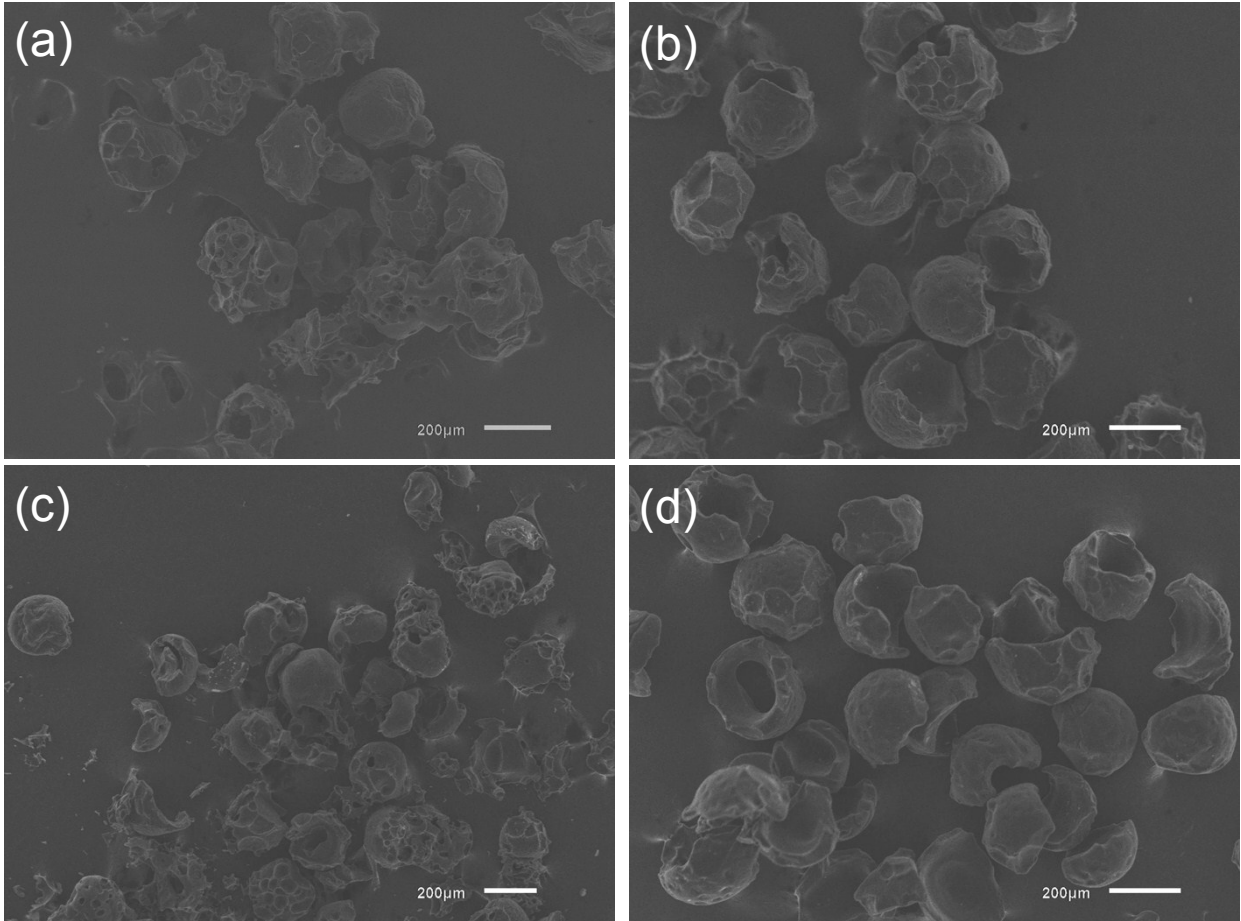

**Fig. S4.** SEM micrographs of (a) GCB-0.1-700, (b) GCB-0.1-800, (d) GCB-0.1-900 and (e) GCB-0.1-1000 activated carbon beads.

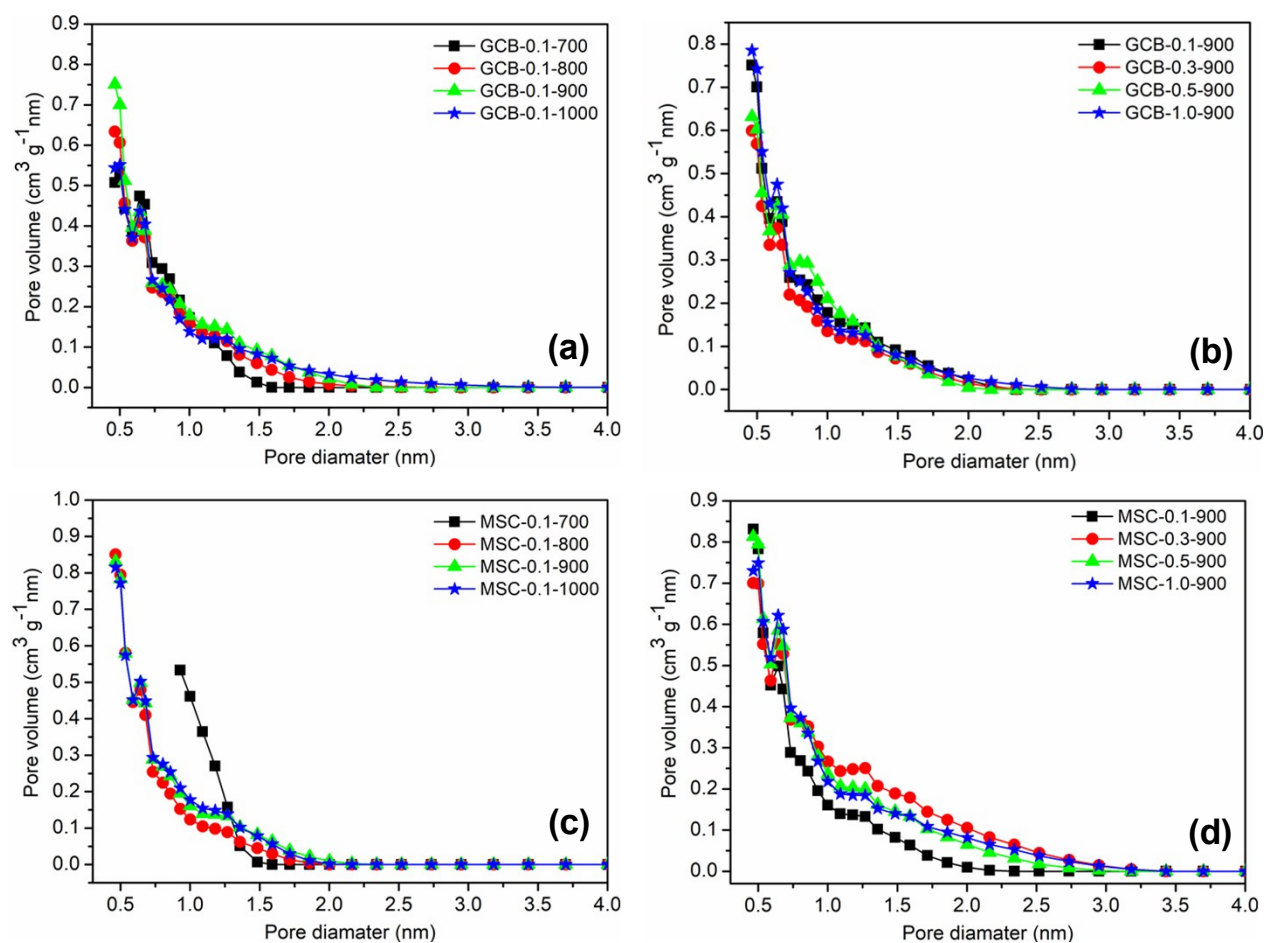

**Fig. S5.** DFT pore size distributions in activated carbon obtained from GCB at different carbonization temperature (a), after an exchange with KCl solution of different concentration and carbonization at 900°C (b); and from MSC at different carbonization temperature (c), after an exchange with KCl solution of different concentration and carbonization at 900°C (d).

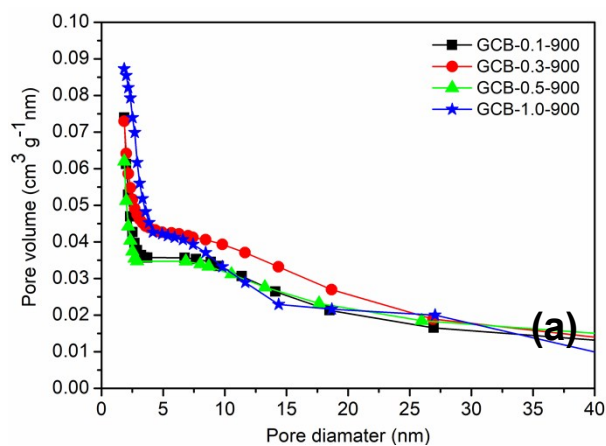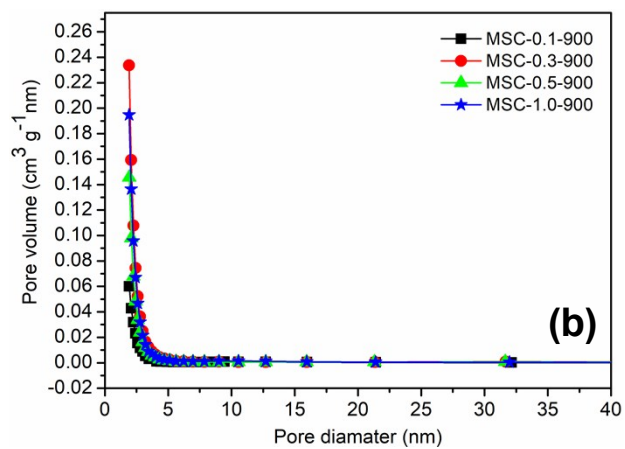

**Fig. S6.** BJH pore size distributions in the carbon beads obtained from GCB (a) and MSC (b) precursors ion exchange resin.

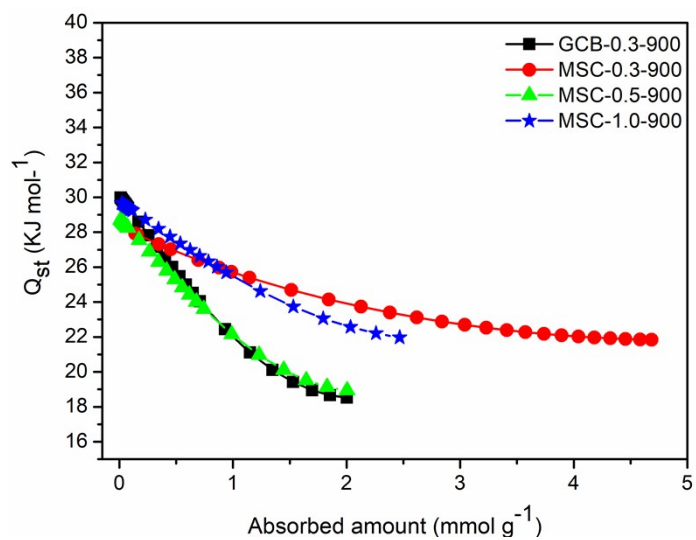

**Fig. S7.** Isosteric heat of CO<sub>2</sub> adsorption on GCB-0.3-900, MSC-0.3-900, MSC-0.5-900, and MSC-1.0-900 calculated from the experimental adsorption isotherms at 273 K and 298 K.



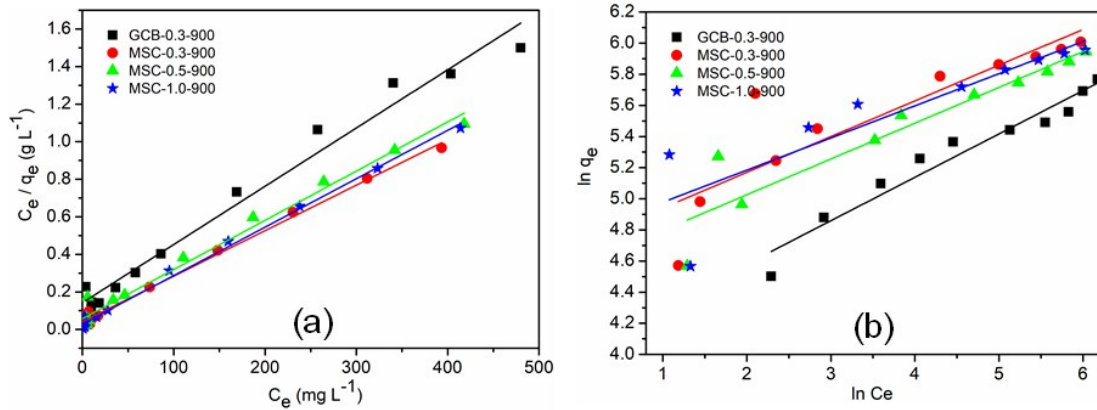

**Fig. S8.** Analyses on the OTC adsorption isotherms by Langmuir (a) and Freundlich (b) models (adsorption time: 12 h, adsorption temperature: 25 °C;  $C_0 = 20\text{--}800$  mg L<sup>-1</sup>; Dose of adsorbents: 1 g L<sup>-1</sup>).
